# Supplementary material for: Characterization of the Ca2+-Gated and Voltage-Dependent K+-Channel Slo-1 of Nematodes and Its Interaction with Emodepside
Source: PubMed Central journal article supplement (PMC4270693; doi:10.1371/journal.pntd.0003401), 2014-12-18

RCK domains Ca<sup>2+</sup> bowl  
Voltage sensor (HMM Pfam Pf07885)

Transmembrane domains S0 S1 S2 S3 S4 S5 S6

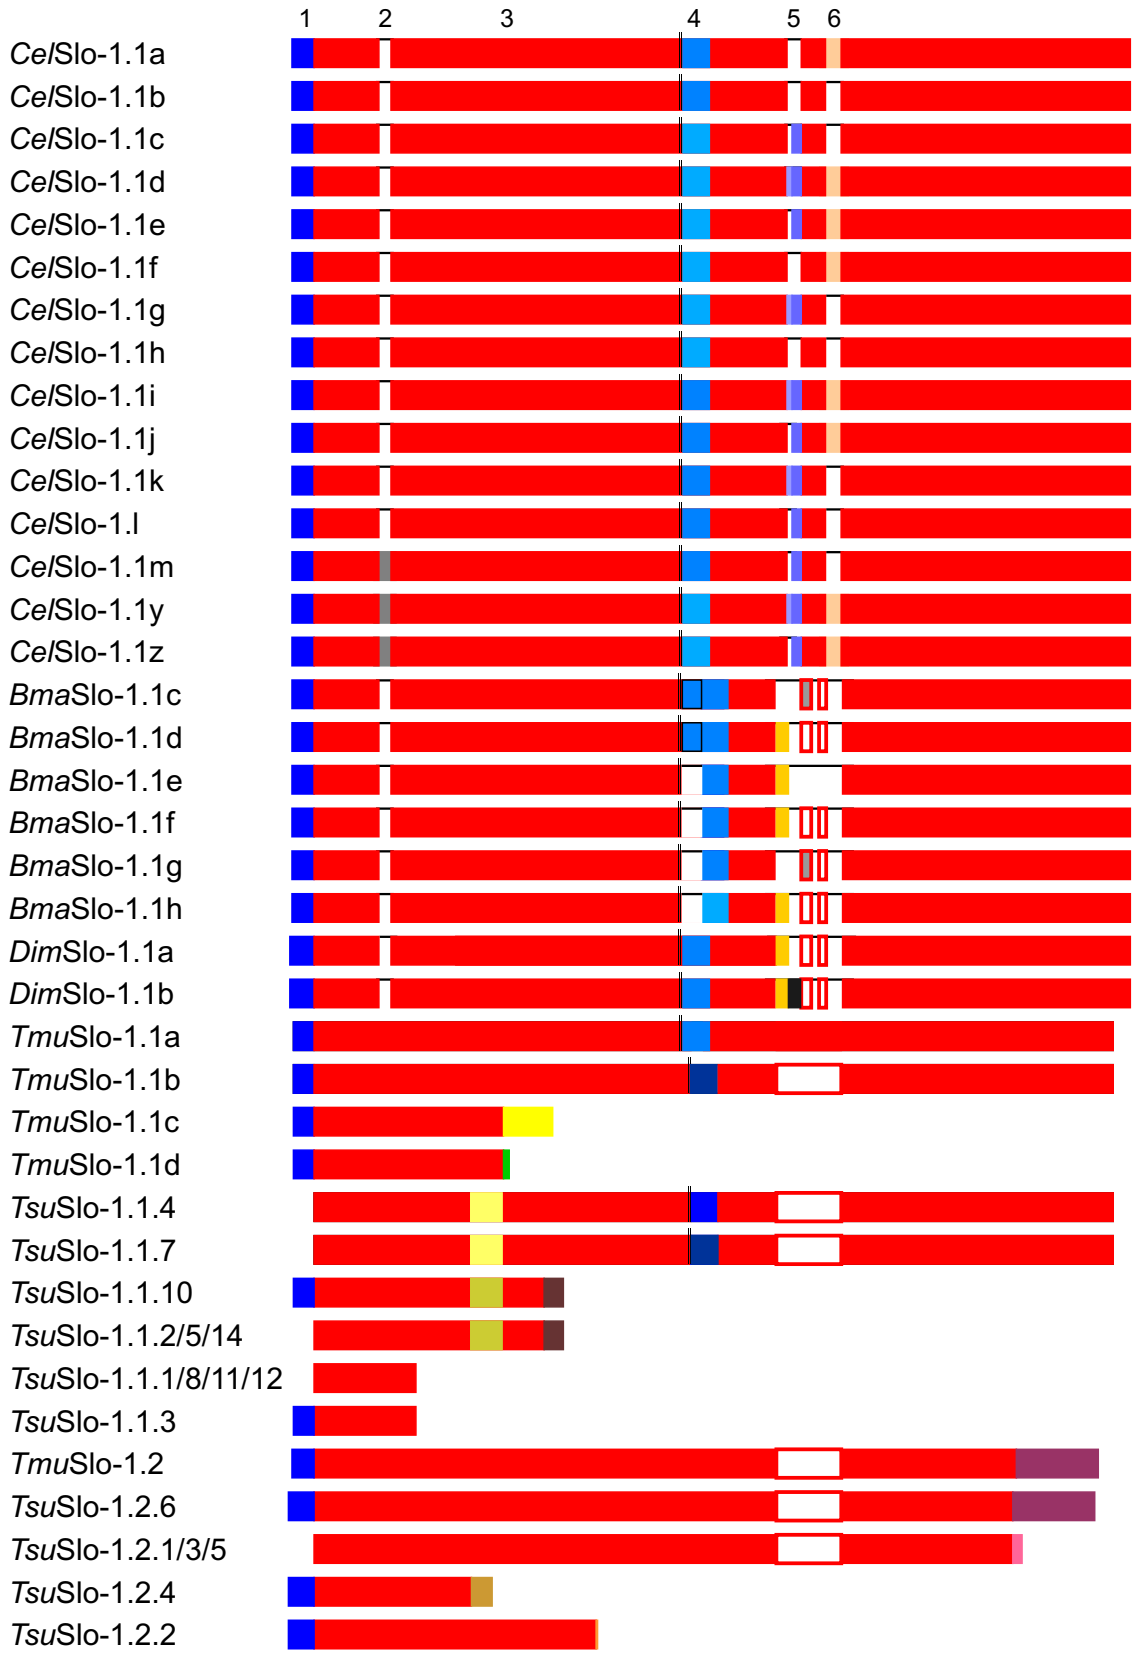

Supplement: pntd.0003401.s002.pdf [file pntd.0003401.s002.pdf]
