# Supplementary material for: Characterization of the Ca2+-Gated and Voltage-Dependent K+-Channel Slo-1 of Nematodes and Its Interaction with Emodepside
Source: PubMed Central journal article supplement (PMC4270693; doi:10.1371/journal.pntd.0003401), 2014-12-18
Supplement: pntd.0003401.s005.pdf [file pntd.0003401.s005.pdf]

**Table S1.** Primers used for amplification of full-length slo-1 cDNA sequences, splice analysis or RACE PCRs

| Target sequence                         | Primer name                                | Primer sequence 5' → 3'                                                   |
|-----------------------------------------|--------------------------------------------|---------------------------------------------------------------------------|
| <i>B. malayi</i> slo-1 full-length      | Bm slo-1 Full for<br>Bm slo-1 Full rev     | GATAAATACATCGAAGGATGAGCG<br>CAGGTAAGCACAAATAGGTCATAAG                     |
| <i>D. immitis</i> slo-1a/b full-length  | Di slo-1 Full for<br>Di slo-1 Full rev     | ATGAGCGATGTATACCATCCTGGATCCGGT<br>TACAGGTAGAGCATTCTTGAGCTACATCAT          |
| <i>O. gutturosa</i> slo-1 full-length   | Og slo-1 Full for<br>Og slo-1 Full rev     | ATTACCCAAGTTTGAGGTATTATTTTATTG-3<br>GTAGAGCATTGAGCTACATCATTTTTTA          |
| <i>A. suum</i> slo-1 full-length        | As slo-1 Full for<br>As slo-1 Full rev     | CATCGCCAATCCGCCGAGGAT<br>AGCAATTTTCATCGGGTCAT                             |
| <i>P. equorum</i> slo-1 full-length     | Pe slo-1 Full for<br>Pe slo-1 Full rev     | CGCACCCTAGTGCCTATCA<br>AGCAATTTTCGTTGGGTCAT                               |
| <i>T. canis</i> slo-1 full-length       | Tc slo-1 Full for<br>Tc slo-1 Full rev     | TCAGAGCTGACCGTGTCTTG<br>CGAATAGGGTAGCGGTTTCTC                             |
| <i>T. muris</i> slo-1.1 full-length     | Tm slo-1.1 Full for<br>Tm slo-1.1 Full rev | AACTTCTTCTTCCCAGGTTGGACCTCCCCAGTT<br>ATCGTGGTCATGTGCTACTGTTCAATCTGTTTCGTT |
| <i>T. muris</i> slo-1.2 full-length     | Tm slo-1.2 Full for<br>Tm slo-1.2 Full rev | CCTTAGCCCATCGTCACAGTTCAT<br>TCATCGTTTCGCAGGTTTCATAGGGTATAACC              |
| <i>T. muris</i> slo-1.1 splice analysis | Tm slo-1.1 IEA for<br>Tm slo-1.1 IEA rev   | ACCTGTTTGCTATGCGCTCG<br>CATAGGTAGTAACTGAGCCA                              |
| <i>D. immitis</i> slo-1 5'-RACE         | Dm slo-1 5RACE1                            | AGGCACGAGACATATTACAATGCA                                                  |
| <i>D. immitis</i> slo-1 5'-RACE         | Dm slo-1 5RACE2                            | TCGGATAACCGTACGGAGCTGGTGGAAATC                                            |
| <i>D. immitis</i> slo-1 5'-RACE         | Dm slo-1 5RACE3                            | TCGATCCACCGGATCCAGGATGGTATAACAT                                           |
| <i>D. immitis</i> slo-1 3'-RACE         | Dm slo-1 3RACE1                            | GGTTGTATCGGTTACACGAC                                                      |
| <i>D. immitis</i> slo-1 3'-RACE         | Dm slo-1 3RACE2                            | GTCGATTCCAATAAACGATATGTC                                                  |
| <i>D. immitis</i> slo-1 3'-RACE         | Dm slo-1 3RACE3                            | CAAATCCACCAGCCGAACACTACGAT                                                |
| <i>O. gutturosa</i> slo-1 5'-RACE       | Og slo-1 5RACE1                            | CAATTCATGCTTTCCTTCATCC                                                    |
| <i>O. gutturosa</i> slo-1 5'-RACE       | Og slo-1 5RACE2                            | TATCTATTTTCGTCGTCGTTCTCTTTGTTGACAA                                        |
| <i>O. gutturosa</i> slo-1 5'-RACE       | Og slo-1 5RACE3                            | TCCAAATAACAACCAATAACATTGATACACAA                                          |
| <i>O. gutturosa</i> slo-1 3'-RACE       | Og slo-1 3RACE1                            | ATGGAAGTACTGACTGGCAGA                                                     |
| <i>O. gutturosa</i> slo-1 3'-RACE       | Og slo-1 3RACE2                            | GCGCAGGATTACGAGGCGGA                                                      |
| <i>O. gutturosa</i> slo-1 3'-RACE       | Og slo-1 3RACE3                            | CGAGATCGGTGCAGGATCTC                                                      |
| <i>T. muris</i> slo-1.1 5'-RACE         | Tm slo-1 5RACE1                            | GAACTTCCTGGGCTGGTGCTGCTGCGGTGGCGA                                         |
| <i>T. muris</i> slo-1.1 5'-RACE         | Tm slo-1.1 5RACE2                          | TGATAATGGAAGACAGTAGGAAGCACCAGTACTT                                        |
| <i>T. muris</i> slo-1.1 5'-RACE         | Tm slo-1.1 5RACE3                          | GAGGCAGCGCCTTTCTTCTCGGTCATCTGGTGC                                         |
| <i>T. muris</i> slo-1.1 3'-RACE         | Tm slo-1.1 3RACE1                          | ATGCTGTCCATTGGGCTGTACAGACTGCACGACTT                                       |
| <i>T. muris</i> slo-1.1 3'-RACE         | Tm slo-1.1 3RACE2                          | ACTCCAACAGACTACGTGTACGTTCTTCAACCA                                         |
| <i>T. muris</i> slo-1.1 3'-RACE         | Tm slo-1.1 3RACE3                          | ACGACCACGGTTTGAAGTATCCAACGAAACAGAT                                        |
| <i>T. muris</i> slo-1.2 5'-RACE         | Tm slo-1.2 5RACE1                          | GTTCTGAGCACCACCGGAA                                                       |
| <i>T. muris</i> slo-1.2 5'-RACE         | Tm slo-1.2 5RACE2                          | GTCGAGATTGCGTCGCGATTGGTTAGC                                               |
| <i>T. muris</i> slo-1.2 5'-RACE         | Tm slo-1.2 5RACE3                          | GTGAGACGTCGTAAGTATCCAACGAAACAGAT                                          |
| <i>T. muris</i> slo-1.2 3'-RACE         | Tm slo-1.2 3RACE1                          | CGACGACAACCTGGAATGCA                                                      |
| <i>T. muris</i> slo-1.2 3'-RACE         | Tm slo-1.2 3RACE2                          | CAATCCAGAGTCAAGCGCCGTGATTAAG                                              |
| <i>T. muris</i> slo-1.2 3'-RACE         | Tm slo-1.2 3RACE3                          | ATTGCTCAATCAGCAGACGAGGTGAAGC                                              |
| <i>T. canis</i> slo-1 5'-RACE           | Tc slo-1 5RACE1                            | AGAAGCCTTGTTTTCGCGCTGAATTG                                                |
| <i>T. canis</i> slo-1 5'-RACE           | Tc slo-1 5RACE2                            | GAATTGTGGTGATTGGTGCTGGATTT                                                |
| <i>T. canis</i> slo-1 5'-RACE           | Tc slo-1 5RACE3                            | TTGCACCAATAGAATGCCCTTTTCAC                                                |
| <i>T. canis</i> slo-1 5'-RACE           | Tc slo-1 5RACE4                            | TGTGCAATGAAGAAGCCTTGTGTTTG                                                |
| <i>T. canis</i> slo-1 5'-RACE           | Tc slo-1 5RACE5                            | TCCACTCCCTTCTGAGGTAATCCACA                                                |
| <i>T. canis</i> slo-1 5'-RACE           | Tc slo-1 5RACE6                            | ACTTCATGTCTTGTGCTCGAACTCC                                                 |
| <i>T. canis</i> slo-1 5'-RACE           | Tc slo-1 5RACE7                            | CGCCGAGAATGAAGAACACCATAAAA                                                |
| <i>T. canis</i> slo-1 5'-RACE           | Tc slo-1 5RACE8                            | CGTACTCTGCGTTGTACCACTGCTTG                                                |
| <i>T. canis</i> slo-1 5'-RACE           | Tc slo-1 5RACE9                            | GTTTCCACTTGAAAATTGGGGTGTGA                                                |
| <i>T. canis</i> slo-1 5'-RACE           | Tc slo-1 5RACE10                           | GAGAGGATGAAGACGAGCACCACAAG                                                |
| <i>T. canis</i> slo-1 5'-RACE           | Tc slo-1 5RACE11                           | GCGAACCCGTCTACTTCATTCTTCAA                                                |
| <i>T. canis</i> slo-1 5'-RACE           | Tc slo-1 5RACE12                           | GAGGTGATTTGCTGTGAAGGACTGT                                                 |
| <i>T. canis</i> slo-1 5'-RACE           | Tc slo-1 5RACE13                           | CAACGAAACTTGGAGGAATGGTGAAA                                                |
| <i>T. canis</i> slo-1 5'-RACE           | Tc slo-1 5RACE14                           | CCAAACCTTGTCCGATGCAGCTATAA                                                |
| <i>T. canis</i> slo-1 3'-RACE           | Tc slo-1 3RACE1                            | CGCGGCTCGGCTTACTATTACTCGCTATT                                             |

**Table S1.** Primers used for amplification of full-length slo-1 cDNA sequences or splice analysis (continued)

| <b>Target sequence</b>          | <b>Primer name</b> | <b>Primer sequence</b>        |
|---------------------------------|--------------------|-------------------------------|
| <i>A. suum</i> slo-1 5'-RACE    | As slo-1 5RACE1    | GAAATGGCTCACCGATTTCGTACGTTA   |
| <i>A. suum</i> slo-1 5'-RACE    | As slo-1 5RACE2    | ACTGTGCCGGTAAAGAATTCGACCTT    |
| <i>A. suum</i> slo-1 5'-RACE    | As slo-1 5RACE3    | ACCGTACTTCTGTCTCGAACCGATCA    |
| <i>A. suum</i> slo-1 5'-RACE    | As slo-1 5RACE4    | ATCCGCCGAGGATGAAGAATACCATA    |
| <i>A. suum</i> slo-1 5'-RACE    | As slo-1 5RACE5    | GAGGCCGCTATAAACCGAATGAAGAA    |
| <i>A. suum</i> slo-1 5'-RACE    | As slo-1 5RACE6    | AAAACCGAGGTCGATCTGTTGTGAAG    |
| <i>A. suum</i> slo-1 5'-RACE    | As slo-1 5RACE7    | ACTGTCATTAATCGAAGCGCACGAAG    |
| <i>A. suum</i> slo-1 5'-RACE    | As slo-1 5RACE8    | AGGAAGCGAAGACCTAGCCAATTACG    |
| <i>A. suum</i> slo-1 5'-RACE    | As slo-1 5RACE9    | GCCGGTGAGGCAAACAGAAATAAAAA    |
| <i>A. suum</i> slo-1 5'-RACE    | As slo-1 5RACE10   | TGCGATGTGTATTGGCAAAGTTCTTG    |
| <i>A. suum</i> slo-1 5'-RACE    | As slo-1 5RACE11   | AGCGATCCAATGGAAAGGATGAAGAC    |
| <i>A. suum</i> slo-1 5'-RACE    | As slo-1 5RACE12   | GGATGGTGAGAAGAGGTGTGTGCGAGT   |
| <i>A. suum</i> slo-1 3'-RACE    | As slo-1 3RACE1    | GATCTGCTGTTCACTCGACTCGGATT    |
| <i>A. suum</i> slo-1 3'-RACE    | As slo-1 3RACE2    | GCTTGCGATTGAGCTAAAAGATGACG    |
| <i>P. equorum</i> slo-1 5'-RACE | Pe slo-1 5RACE1    | CTGGAGGCACCCTATGAAGAAAAGACC   |
| <i>P. equorum</i> slo-1 5'-RACE | Pe slo-1 5RACE2    | AACTGTGCCGGTAAAGAACTCGACCT    |
| <i>P. equorum</i> slo-1 5'-RACE | Pe slo-1 5RACE3    | GAAAATCCTGAAGGAAATGGCTCACC    |
| <i>P. equorum</i> slo-1 5'-RACE | Pe slo-1 5RACE4    | GTCTCGAACCGATCAAGTCAGCAATC    |
| <i>P. equorum</i> slo-1 5'-RACE | Pe slo-1 5RACE5    | ATCCGCCGAGGATGAAGAATACCATA    |
| <i>P. equorum</i> slo-1 5'-RACE | Pe slo-1 5RACE6    | AATTTCGGATGTGATGCGTCGTA AAAAG |
| <i>P. equorum</i> slo-1 5'-RACE | Pe slo-1 5RACE7    | GCGATCCAATGGAAAGGATGAAGACT    |
| <i>P. equorum</i> slo-1 5'-RACE | Pe slo-1 5RACE8    | AGCGATCCAATGGAAAGGATGAAGAC    |
| <i>P. equorum</i> slo-1 5'-RACE | Pe slo-1 5RACE9    | ATCCTCCACATCACCACAAGAAGCAT    |
| <i>P. equorum</i> slo-1 5'-RACE | Pe slo-1 5RACE10   | ATGGTGAGAAGAGGTGCGTCGAGTAG    |
| <i>P. equorum</i> slo-1 5'-RACE | Pe slo-1 5RACE11   | AGTACGTGGAATTGCATGAGGATGGT    |
| <i>P. equorum</i> slo-1 3'-RACE | Pe slo-1 3RACE1    | TGCTTGCGATTGAGTTAAAAGATGACG   |
| <i>P. equorum</i> slo-1 3'-RACE | Pe slo-1 3RACE2    | GTTCGAGACACACACCAGACTGGCTAA   |
