# Supplementary material for: Characterization of the Ca2+-Gated and Voltage-Dependent K+-Channel Slo-1 of Nematodes and Its Interaction with Emodepside
Source: PubMed Central journal article supplement (PMC4270693; doi:10.1371/journal.pntd.0003401), 2014-12-18
Supplement: pntd.0003401.s006.pdf [file pntd.0003401.s006.pdf]

**Table S2.** Details for Slo-1 channel protein sequences using for phylogenetic analysis and identification of splice variants

| Species                        | Systematic position                                  | Protein          | Amino acid length | Molecular Weight (kDa) | pI   | Accession no. <sup>a</sup> |
|--------------------------------|------------------------------------------------------|------------------|-------------------|------------------------|------|----------------------------|
| <i>Caenorhabditis elegans</i>  | Chromadorea<br>Rhabditida<br>Rhabditoidea<br>clade V | <i>CelSlo-1a</i> | 1140              | 129.5                  | 5.75 | NP_001024259               |
| <i>Caenorhabditis elegans</i>  | Chromadorea<br>Rhabditida<br>Rhabditoidea<br>clade V | <i>CelSlo-1b</i> | 1118              | 127.0                  | 5.67 | NP_001024260               |
| <i>Caenorhabditis elegans</i>  | Chromadorea<br>Rhabditida<br>Rhabditoidea<br>clade V | <i>CelSlo-1c</i> | 1131              | 128.6                  | 5.58 | NP_001024261               |
| <i>Caenorhabditis briggsae</i> | Chromadorea<br>Rhabditida<br>Rhabditoidea<br>clade V | <i>CbrSlo-1</i>  | 1142              | 129.7                  | 5.69 | XP_2638493                 |
| <i>Caenorhabditis remanei</i>  | Chromadorea<br>Rhabditida<br>Rhabditoidea<br>clade V | <i>CreSlo-1</i>  | 1167              | 132.6                  | 5.77 | XP_003094347               |
| <i>Haemonchus contortus</i>    | Chromadorea<br>Rhabditida<br>Rhabditoidea<br>clade V | <i>HcoSlo-1</i>  | 1105              | 125.2                  | 5.77 | ABS45068                   |
| <i>Cooperia oncophora</i>      | Chromadorea<br>Rhabditida<br>Rhabditoidea<br>clade V | <i>ConSlo-1</i>  | 1111              | 125.9                  | 5.80 | ABS45069                   |

| Species                       | Systematic position                                       | Protein          | Amino acid length | Molecular Weight (kDa) | pI   | Accession no. <sup>a</sup>          |
|-------------------------------|-----------------------------------------------------------|------------------|-------------------|------------------------|------|-------------------------------------|
| <i>Ancylostoma caninum</i>    | Chromadorea<br>Rhabditida<br>Rhabditoidea<br>clade V      | <i>AcaSlo-1</i>  | 1116              | 126.7                  | 5.44 | ACC68842                            |
| <i>Pristionchus pacificus</i> | Chromadorea<br>Rhabditida<br>Rhabditoidea<br>clade V      | <i>PpaSlo-1</i>  | 1188              | 134.1                  | 5.56 | PPA29145 <sup>b</sup>               |
| <i>Strongyloides ratti</i>    | Chromadorea<br>Rhabditida<br>Panagrolaimoidea<br>Clade IV | <i>SraSlo-1</i>  | 1170              | 131.4                  | 5.51 | Sr321_0X00136<br>00.t1 <sup>c</sup> |
| <i>Meloidogyne incognita</i>  | Chromadorea<br>Tylenchida<br>Tylenchoidea<br>CladeIV      | <i>MinSLO-1</i>  | 1120              | 126.4                  | 5.39 | Minc04076a <sup>d</sup>             |
| <i>Dirofilaria immitis</i>    | Chromadorea<br>Spirurida<br>clade III                     | <i>DimSlo-1a</i> | 1119              | 126.7                  | 5.27 | AFH88396                            |
| <i>Dirofilaria immitis</i>    | Chromadorea<br>Spirurida<br>clade III                     | <i>DimSlo-1b</i> | 1104              | 125.0                  | 5.44 | AFX93730                            |
| <i>Onchocerca gutturosa</i>   | Chromadorea<br>Spirurida<br>clade III                     | <i>OguSlo-1</i>  | 1119              | 126.8                  | 5.27 | ADY18306                            |
| <i>Brugia malayi</i>          | Chromadorea<br>Spirurida<br>clade III                     | <i>BmaSlo-1c</i> | 1115              | 126.3                  | 5.19 | BM6719c <sup>b</sup>                |
| <i>Brugia malayi</i>          | Chromadorea<br>Spirurida<br>clade III                     | <i>BmaSlo-1d</i> | 1132              | 128.2                  | 5.39 | BM6719d <sup>b</sup>                |
| <i>Brugia malayi</i>          | Chromadorea<br>Spirurida<br>clade III                     | <i>BmaSlo-1e</i> | 1079              | 122.3                  | 5.30 | BM6719e <sup>b</sup>                |

| Species                   | Systematic position                      | Protein            | Amino acid length | Molecular Weight (kDa) | pI   | Accession no. <sup>a</sup>       |
|---------------------------|------------------------------------------|--------------------|-------------------|------------------------|------|----------------------------------|
| <i>Brugia malayi</i>      | Chromadorea<br>Spirurida<br>clade III    | <i>BmaSlo-1f</i>   | 1104              | 125.1                  | 5.40 | BM6719f <sup>b</sup><br>KJ531222 |
| <i>Brugia malayi</i>      | Chromadorea<br>Spirurida<br>clade III    | <i>BmaSlo-1g</i>   | 1087              | 123.2                  | 5.19 | BM6719g <sup>b</sup>             |
| <i>Brugia malayi</i>      | Chromadorea<br>Spirurida<br>clade III    | <i>BmaSlo-1h</i>   | 1104              | 125.0                  | 5.44 | BM6719h <sup>b</sup>             |
| <i>Ascaris suum</i>       | Chromadorea<br>Ascaridoidea<br>clade III | <i>AsuSlo-1</i>    | 1117              | 126.4                  | 5.04 | ACC68842                         |
| <i>Parascaris equorum</i> | Chromadorea<br>Ascaridoidea<br>clade III | <i>PeqSlo-1</i>    | 1108              | 125.2                  | 5.51 | ACC68843                         |
| <i>Toxocara canis</i>     | Chromadorea<br>Ascaridoidea<br>clade III | <i>TcaSlo-1</i>    | 1123              | 126.9                  | 5.38 | ACJ64718                         |
| <i>Trichuris muris</i>    | Enoplea<br>Trichocephalida<br>clade I    | <i>TmuSlo-1.1a</i> | 1151              | 130.1                  | 5.70 | AEB96250                         |
| <i>Trichuris muris</i>    | Enoplea<br>Trichocephalida<br>clade I    | <i>TmuSlo-1.1b</i> | 1151              | 130.2                  | 5.67 | KJ531218                         |
| <i>Trichuris muris</i>    | Enoplea<br>Trichocephalida<br>clade I    | <i>TmuSlo-1.1c</i> | 346               | 41.5                   | 6.21 | KJ531219                         |
| <i>Trichuris muris</i>    | Enoplea<br>Trichocephalida<br>clade I    | <i>TmuSlo-1.1d</i> | 303               | 34.7                   | 6.48 | KJ531220                         |

| Species                           | Systematic position                      | Protein           | Amino acid length | Molecular Weight (kDa) | pI   | Accession no. <sup>a</sup>                                |
|-----------------------------------|------------------------------------------|-------------------|-------------------|------------------------|------|-----------------------------------------------------------|
| <i>Trichuris muris</i>            | Enoplea<br>Trichocephalida<br>clade I    | <i>TmuSlo-1.2</i> | 1123              | 126.9                  | 5.59 | KJ531221                                                  |
| <i>Trichinella spiralis</i>       | Enoplea<br>Trichocephalida<br>clade I    | <i>TspSlo-1.1</i> | 1134              | 128.5                  | 5.57 | XP_003370273<br>XP_003370274 <sup>e</sup>                 |
| <i>Trichinella spiralis</i>       | Enoplea<br>Trichocephalida<br>clade I    | <i>TspSlo-1.2</i> | 1129              | 128.0                  | 5.2  | XP_003370270<br>XP_003370271<br>XP_003370272 <sup>e</sup> |
| <i>Daphnia pulex</i>              | Ecdysozoa<br>Crustacea<br>Branchiopoda   | <i>DpuSlo-1</i>   | 1028              | 115.7                  | 5.60 | EFX85873                                                  |
| <i>Pediculus humanus corporis</i> | Ecdysozoa<br>Insecta<br>Anoplura         | <i>PhuSlo-1</i>   | 1141              | 127.9                  | 5.28 | XP_002425826                                              |
| <i>Anopheles gambiae</i>          | Ecdysozoa<br>Insecta<br>Diptera          | <i>AgaSlo-1</i>   | 1154              | 129.1                  | 5.19 | XP_313505.5                                               |
| <i>Drosophila melanogaster</i>    | Ecdysozoa<br>Insecta<br>Diptera          | <i>DmeSlo-1Q</i>  | 1175              | 130.3                  | 5.13 | NP_001014651                                              |
| <i>Drosophila melanogaster</i>    | Ecdysozoa<br>Arthropoda<br>Diptera       | <i>DmeSlo-1S</i>  | 1210              | 134.4                  | 5.48 | NP_001163712                                              |
| <i>Aplysia californica</i>        | Lophotrochozoa<br>Mollusca<br>Gastropoda | <i>AcalSlo-1</i>  | 1070              | 120.2                  | 6.34 | AAR27959                                                  |
| <i>Gallus gallus</i>              | Vertebrata<br>Aves                       | <i>GgaSlo-1</i>   | 1140              | 128.1                  | 6.60 | AAD16633                                                  |

| Species             | Systematic position                  | Protein         | Amino acid length | Molecular Weight (kDa) | pI   | Accession no. <sup>a</sup> |
|---------------------|--------------------------------------|-----------------|-------------------|------------------------|------|----------------------------|
| <i>Bos taurus</i>   | Vertebrata<br>Mammalia<br>Ruminantia | <i>BtaSlo-1</i> | 1166              | 130.1                  | 6.31 | NP_777105                  |
| <i>Homo sapiens</i> | Vertebrata<br>Mammalia<br>Primates   | <i>HsaSlo-1</i> | 1236              | 135.6                  | 6.64 | NP_001154824               |

<sup>a</sup>If not further specified protein accession numbers from GenBank are given.

<sup>b</sup>In WormBase.

<sup>c</sup>In Sanger *S. ratti* genome database.

<sup>d</sup>In INRA *M. incognita* genome database.

<sup>e</sup>A full-length consensus sequence was built from these entries.
